# Supplementary material for: Dietary Patterns of 479 Indonesian Adults and Their Associations with Sodium and Potassium Intakes Estimated by Two 24-h Urine Collections
Source: MDPI journal article supplement (doi:10.3390/nu14142905), 2022-07-15
Supplement: s1 [file s1]

**Supplementary Table S1. The food list used in the present study for dietary pattern analysis**

| Food groups (n)                                                                                | Food items                                                                                                                                                                                                                                      |
|------------------------------------------------------------------------------------------------|-------------------------------------------------------------------------------------------------------------------------------------------------------------------------------------------------------------------------------------------------|
| Staples (3)                                                                                    | Rice, corn rice                                                                                                                                                                                                                                 |
| Staples with fat/oil (3)                                                                       | Chicken porridge, rice (with coconut milk), fried rice                                                                                                                                                                                          |
| Noodle (7)                                                                                     | Soup rice vermicelli, <i>kwetiau</i> soup, noodles soup, fried noodles, fried rice vermicelli, chicken noodle, noodle <i>soto</i>                                                                                                               |
| Root, tubers (2)                                                                               | Cassava rice, root & tubers (boiled and fried)                                                                                                                                                                                                  |
| Poultry (6)                                                                                    | Fried chicken/ chicken nugget, spicy chicken coconut milk, chicken satay, claw chicken, duck                                                                                                                                                    |
| Red meats (3)                                                                                  | Boiled cow's soft bone, stir fry cow's soft bone, <i>rendang</i>                                                                                                                                                                                |
| Organ meats (5)                                                                                | Fried gizzard, stir gizzard, fried liver, stir fry liver, fried chicken intestine                                                                                                                                                               |
| Processed meat product (2)                                                                     | Grilled sausage, fried sausage                                                                                                                                                                                                                  |
| Fish and shellfish (6)                                                                         | Fried fish/ spicy fried fish, steamed fish, stir fry squid, fried squid, fried shrimp/ spicy fried shrimp, grill fish                                                                                                                           |
| Salty sea products (3)                                                                         | Anchovy with peanuts, wet salted fish, dries salted fish                                                                                                                                                                                        |
| Eggs (3)                                                                                       | Boiled eggs, quail eggs, fried eggs                                                                                                                                                                                                             |
| Non-fried soybean product (2)                                                                  | Boiled tofu, tofu/ tempeh steam                                                                                                                                                                                                                 |
| Fried soybean product (6)                                                                      | Sweet fried tofu, fried tofu, sweet fried tempeh, fried tempeh, sweet and spicy fried tempeh, tofu with noodle (fried)                                                                                                                          |
| Composite foods (7)                                                                            | Rice cake-peanut sauce ( <i>ketoprak</i> ), rice cake-coconut milk vegetable dish, rice cake with soy sauce ( <i>lontong</i> ), meat ball, chicken <i>soto</i> , brown beef soup ( <i>rawon</i> ), lamb curry soup ( <i>gule</i> )              |
| Raw vegetables (5)                                                                             | Raw or boil vegetable A, B, C, sour mixed vegetable, mixed vegetable soup                                                                                                                                                                       |
| Vegetables with additional contain (peanut sauce, oil or coconut milk) / salted vegetables (9) | Stir fry vegetable A and B, vegetable cooked with coconut milk, vegetable with coconut ( <i>krawu</i> ), vegetable with peanut ( <i>gado-gado/ pecel</i> )                                                                                      |
| Fruits (16)                                                                                    | All type of fruits                                                                                                                                                                                                                              |
| Non-fried snacks (7)                                                                           | Biscuit crackers, corn, peanut, sticky rice, cakes, rice cake, bread                                                                                                                                                                            |
| Fried snacks/ fried side dishes (15)                                                           | Fried <i>bakwan</i> , <i>cakwe</i> , <i>cireng</i> , doughnut, cassava chips, potato chips, egg stuffed pancake, fried fish ball, <i>pempek</i> , fried banana, <i>risol/ pastel</i> , potato/ corn fried dish, crackers frying, margarine, oil |
| Desert sweet with coconut milk (4)                                                             | Mug bean, rice flour, mixed ice, <i>kolak</i>                                                                                                                                                                                                   |
| Milk and milk product (5)                                                                      | Milk powder, white milk powder, chocolate milk powder, milo, condensed milk, instant cereal beverages, yogurt, UHT milk                                                                                                                         |
| Tea, coffee, soft drink (6)                                                                    | All type tea (with/ without sugar), all type coffee (with/ without sugar); sweet, sweetened beverages                                                                                                                                           |

*n* : The number of questions in FFQ for each food group.

Supplementary Table S2. Factor-loading matrix for dietary patterns identified among Indonesian men (n=240) and women (n=239) \*

| Food group                                                                                       | Men                                 |                             |                                         |                                  | Women                          |                             |                                         |                           |
|--------------------------------------------------------------------------------------------------|-------------------------------------|-----------------------------|-----------------------------------------|----------------------------------|--------------------------------|-----------------------------|-----------------------------------------|---------------------------|
|                                                                                                  | M1'Meat, vegetable, oil, and fruit' | M2'Staples, oil, and sweet' | M3'Noodle, oil, and salty sea products' | M4'Vegetable, non-oil, and milk' | W1'Meat, vegetable, and fruit' | W2'Staples, oil, and sweet' | W3'Noodle, oil, and salty sea products' | W4'Composite and non-oil' |
| Staples                                                                                          | 0.06                                | <u>0.61</u>                 | 0.02                                    | <u>0.45</u>                      | -0.10                          | <u>0.59</u>                 | 0.15                                    | 0.16                      |
| Staples with fat/oil                                                                             | -0.01                               | -0.22                       | <u>0.78</u>                             | -0.07                            | 0.08                           | -0.02                       | 0.06                                    | 0.13                      |
| Noodle <sup>†</sup>                                                                              | 0.11                                | 0.00                        | <u>0.64</u>                             | -0.11                            | -0.11                          | -0.15                       | <u>0.68</u>                             | 0.30                      |
| Root, tubers <sup>†</sup>                                                                        | -0.13                               | 0.20                        | <u>0.68</u>                             | 0.03                             | -0.02                          | <u>0.53</u>                 | -0.16                                   | 0.00                      |
| Poultry                                                                                          | <u>0.62</u>                         | -0.22                       | 0.17                                    | -0.01                            | <u>0.68</u>                    | -0.29                       | 0.28                                    | -0.11                     |
| Red meats                                                                                        | <u>0.48</u>                         | 0.00                        | -0.20                                   | -0.26                            | <u>0.60</u>                    | -0.02                       | 0.00                                    | 0.15                      |
| Organ meats                                                                                      | 0.19                                | 0.07                        | 0.02                                    | -0.04                            | 0.05                           | 0.07                        | 0.36                                    | -0.08                     |
| Processed meat product <sup>†</sup>                                                              | 0.32                                | -0.26                       | -0.17                                   | -0.03                            | 0.03                           | -0.23                       | <u>0.50</u>                             | 0.07                      |
| Fish and shellfish <sup>‡</sup>                                                                  | 0.34                                | -0.39                       | 0.38                                    | 0.08                             | 0.13                           | -0.30                       | 0.14                                    | -0.09                     |
| Salty sea products                                                                               | 0.03                                | 0.34                        | <u>0.44</u>                             | -0.31                            | -0.13                          | 0.28                        | <u>0.53</u>                             | 0.02                      |
| Eggs                                                                                             | 0.29                                | -0.08                       | -0.03                                   | 0.13                             | 0.22                           | -0.14                       | 0.30                                    | 0.21                      |
| Non-fried soybean product                                                                        | -0.15                               | -0.01                       | -0.07                                   | <u>0.65</u>                      | 0.02                           | 0.04                        | -0.28                                   | <u>0.71</u>               |
| Fried soybean product                                                                            | 0.01                                | <u>0.58</u>                 | -0.19                                   | -0.16                            | 0.13                           | <u>0.50</u>                 | 0.24                                    | -0.36                     |
| Composite foods                                                                                  | 0.03                                | -0.06                       | 0.25                                    | 0.20                             | 0.15                           | 0.25                        | 0.27                                    | <u>0.69</u>               |
| Raw vegetables                                                                                   | -0.16                               | 0.08                        | -0.13                                   | <u>0.67</u>                      | <u>0.47</u>                    | 0.00                        | -0.24                                   | 0.29                      |
| Vegetables with additional energy contain (peanut sauce, oil or coconut milk)/ salted vegetables | <u>0.59</u>                         | 0.22                        | 0.02                                    | -0.11                            | <u>0.61</u>                    | 0.19                        | 0.13                                    | 0.08                      |
| Fruits                                                                                           | <u>0.42</u>                         | -0.01                       | 0.08                                    | 0.35                             | <u>0.82</u>                    | -0.05                       | -0.03                                   | 0.12                      |
| Non-fried snacks                                                                                 | 0.30                                | -0.06                       | 0.14                                    | 0.33                             | 0.27                           | 0.19                        | 0.10                                    | <u>0.82</u>               |
| Fried snacks/ fried side dishes                                                                  | <u>0.52</u>                         | 0.27                        | 0.15                                    | -0.17                            | 0.31                           | 0.07                        | <u>0.53</u>                             | -0.10                     |
| Desert sweet with coconut milk                                                                   | <u>0.52</u>                         | <u>0.42</u>                 | -0.18                                   | 0.08                             | 0.01                           | <u>0.49</u>                 | -0.08                                   | 0.20                      |
| Milk and milk product                                                                            | 0.11                                | <u>-0.49</u>                | -0.06                                   | <u>0.43</u>                      | 0.00                           | <u>-0.50</u>                | 0.01                                    | 0.29                      |
| Tea, coffee, soft drink <sup>††</sup>                                                            | 0.26                                | <u>0.68</u>                 | 0.13                                    | 0.11                             | 0.11                           | <u>0.68</u>                 | 0.18                                    | 0.07                      |

|                         |      |      |      |      |      |      |      |      |
|-------------------------|------|------|------|------|------|------|------|------|
| % of explained variance | 11.7 | 10.2 | 8.8  | 7.7  | 13.9 | 10.7 | 8.8  | 7.3  |
| % of cumulated variance | 11.7 | 21.9 | 30.8 | 38.5 | 13.9 | 24.6 | 33.4 | 40.7 |

---

\* Absolute values > 0.4 are underlined

VARIMAX
